# Supplementary material for: Smoking cessation and reduction in people with chronic mental illness
Source: HighWire-hosted journal article supplement (doi:10.1136/bmj.h4065), 2015-09-21
Supplement: bmj.h4065.pdf [file bmj.h4065.pdf]

# 慢性精神疾病患者的戒烟与减量

## Smoking cessation and reduction in people with chronic mental illness

来源: BMJ 2015;351:h4065 doi: 10.1136/bmj.h4065

### 摘要

大量证据表明,慢性精神疾病患者的吸烟率及烟草相关疾病的发病率、病死率居高不下。本篇综述总结了精神分裂症、抑郁症、焦虑症和创伤后应激障碍人群戒烟疗法的研究结果。对于这些精神疾病人群的高吸烟率,一些实验研究确定了其生物心理社会机制,本综述也进行了概述。研究表明,对于慢性精神疾病吸烟者,极小的精神症状影响也会让他们退出标准戒烟疗法。尽管一些研究指出复吸率很高,但长时间坚持药物疗法可减少复吸率,且不加重精神疾病的症状。不同精神疾病患者开始吸烟和持续吸烟的生物心理社会机制被认为是相似的。对于这些共同因素的了解或许有助于为慢性精神疾病患者开发新的烟草疗法。新型尼古丁和烟草产品,如电子烟和极低含量尼古丁香烟,或许也可用于提高慢性精神疾病患者的戒烟率。

### 前言

在美国和英国,心情不佳、焦虑以及精神障碍人群的吸烟率是无精神疾病人群的2~4倍<sup>1,2</sup>。例如,最近一项对超过9 000名严重精神障碍患者的研究发现,相对于一般人群而言,在控制了性别、种族、年龄和地域因素后,这些人曾吸过100支烟的风险更高(比值比4.61,95%可信区间4.3~4.9)<sup>3</sup>。

与无慢性精神疾病的吸烟者相比,患病吸烟者更依赖于尼古丁,且不太可能戒烟<sup>4,6</sup>。特别是在2004到2011年间,在控制诸如收入、教育和就业等危险因素后,美国居民无精神疾病吸烟者的当前吸烟率从19.2%(18.7%~19.7%)下降到16.5%(16.0%~17.0%),而患病吸烟者的吸烟率没有下降<sup>6</sup>。因此,半数慢性精神疾病患者的死亡可归因于烟草相关癌症、呼吸疾

病和心血管疾病<sup>7-8</sup>。

针对精神分裂症、单相和双相抑郁症、焦虑症以及创伤后应激障碍(PTSD)人群的戒烟疗法,本综述严格评估了其效果。发现慢性精神疾病人群吸烟的诱因,可能有助于对这些人群戒烟新疗法的发展,因此,我们还严格检查了这些人群高吸烟率背后潜在的生物心理社会机制。最后,鉴于目前对电子烟(e-cigarettes)和极低含量尼古丁香烟的商业和监管兴趣,我们描述了这些产品在慢性精神疾病人群中的最新研究,并讨论如何通过使用这些产品提高慢性精神疾病人群的戒烟成果。

### 来源及选择标准

本综述调查了成年(≥18岁)精神分裂症、单相或双相抑郁症、焦虑症以及PTSD患者戒烟疗法的效果和机制。通过搜索PubMed和Science-Direct数据库中2014年12月1日前发表的文章确定参考文献。我们使用下列关键词:“schizophrenia”“depression”“unipolar”“bipolar”“anxiety”“panic”“PTSD”“smoking”“smoking cessation”“clinical trial”“nicotine replacement”“bupropion”“varenicline”“withdrawal”“abstinence”“cigarette”“electronic cigarette”“very low nicotine cigarette”和“denicotinized cigarette”。参考文献还从相关综述、荟萃分析以及作者文档中确定。JWT和MEM两位作者单独审阅了检索出的文题,准备了纳入本篇综述的最初文章名单。随后两位作者审阅了摘要,选出与本综述最相关的研究。因本文不是系统性综述,故没有对入选研究进行打分,而是总结了结果。仅回顾分析了以英语发表的同行评

Jennifer W Tidey,  
Mollie E Miller

Center for Alcohol  
and Addiction  
Studies, Brown  
University,  
Providence, RI  
02912, USA

Correspondence to:  
J Tidey  
Jennifer\_Tidey  
@brown.edu

崔轶译  
中华医学杂志  
英文版编辑部

议文章。通过搜索国际卫生组织的网页,使用“smoking cessation guidelines(戒烟指南)”“tobacco treatment guidelines(烟草治疗指南)”“mental illness(精神疾病)”“mental disorders(精神障碍)”关键词搜索谷歌,我们检查了目前治疗精神疾病人群吸烟的指南。

## 精神分裂症

关于精神分裂症和吸烟之间的关系,近30年前发表的一篇报告引发了研究兴趣,该报告表明在年龄、性别、婚姻、社会经济和饮酒亚组中,慢性精神疾病人群的吸烟率都高于对照人群。该报告还发现精神分裂症患者的吸烟率尤其高(88%)<sup>9</sup>。

引发对精神分裂症吸烟共病研究兴趣的第二个发现,是观察到精神分裂症吸烟者尿中的尼古丁主要代谢产物——可替宁的浓度是非精神分裂症吸烟者的1.6倍<sup>10</sup>。以上的研究结果促进了两个方

向的研究,一个方向旨在为精神分裂吸烟者寻找烟草依赖的潜在疗法,另一个方向旨在确定可能引起这一共病的生物心理社会机制。

## 戒烟研究

### 尼古丁替代疗法加心理社会治疗

对于精神分裂症吸烟者,实施开放标签尼古丁替代疗法(NRT)加包含动机访谈和认知行为疗法(CBT)内容的心理社会治疗,已进行了几项观察性研究(表1)。

3项对24~65名门诊患者的研究发现,6个月随访评估时的戒烟率为9%~14%<sup>11-13</sup>。一项68名门诊患者的研究发现,3个月随访研究的持续戒烟率为23%<sup>14</sup>。在对这类人群的最大规模吸烟研究中,298名精神障碍门诊患者(57%为精神分裂症)被随机分入常规治疗组或10周的动机访谈、CBT加NRT治疗组<sup>15</sup>。12个月随访评估时,治疗组的戒烟率没

表1 精神分裂症门诊患者NRT戒烟治疗试验结果\*

| 研究                                   | 数量  | 干预                                                                             | 戒烟率                                                                                                                                                                        | 其他结果                                                                         |
|--------------------------------------|-----|--------------------------------------------------------------------------------|----------------------------------------------------------------------------------------------------------------------------------------------------------------------------|------------------------------------------------------------------------------|
| Ziedonis 和 George 1997 <sup>11</sup> | 24  | 10周的开放标签NRT(21 mg贴片和口香糖)加每周行为、心理教育和动机强化治疗(无对照组)                                | 50%完成项目,13%戒烟6个月                                                                                                                                                           | 40%患者的CPD减半;精神症状无改变                                                          |
| Addington 等 1998 <sup>12</sup>       | 65  | 10周的开放标签NRT(21 mg贴片)加7周的每周小组会谈,基于ALA专为精神分裂症人群打造的“不再吸烟”项目治疗(无对照组)               | 77%完成治疗;其中42%完成者(32%入组者)治疗结束时戒烟,3个月随访时为16%(12%入组者),6个月随访时为12%(9%入组者)                                                                                                       | 小组会谈出席情况与随访戒烟率相关;精神症状或锥体外系症状无改变                                              |
| George 等 2000 <sup>13</sup>          | 45  | 10周的开放标签NRT(21 mg贴片)加随机参加ALA“不再吸烟”项目或包含动机、行为和心理学教育内容的定制项目治疗                    | 定制项目中,32.1%患者在治疗结束时连续戒烟4周,ALA项目中23.5%( $P<0.06$ );ALA项目6个月戒烟率为17.6%,定制项目10.7%                                                                                              | 非典型抗精神病药的使用与较长的治疗维持和更高的戒烟率有关;对精神症状运动障碍或锥体外系症状的治疗或戒烟无效                        |
| Chou 等 2004 <sup>14</sup>            | 68  | 8周的开放标签NRT(14 mg贴片)或仅评估的对照治疗                                                   | 3个月时NRT组的时点戒烟率为26.9%,持续戒烟率为23.1%,对照组0%(未报告显著水平)                                                                                                                            | 试验组3个月时每日吸烟率减少一半以上;对照组无变化                                                    |
| Baker 等 2006 <sup>15</sup>           | 298 | 随机分入10周的治疗组,包括开放标签NRT(21 mg贴片)、8场个人动机访谈以及CBT,或常规治疗组,由宣传册和社区治疗组成                | 每次评估时干预组的戒烟率表面上较高,但无显著差异(6个月的时点戒烟率9.5%比4%,比值比2.54,99%CI 0.70~9.28;12个月10.9%比6.6%,1.72,0.58~5.09);治疗组中参加全部访谈的“主动”小组的患者,在每个随访时间上的戒烟率都显著高于对照组(6个月的时点戒烟率18.6%,5.51,1.45~20.91) | 与对照组相比,治疗组中有更多患者的吸烟率降低50%;使用非典型药物并未减少戒烟或照顾;两组中,NRT的使用与吸烟减量有关;2组的功能和症状随时间有所改善 |
| Horst 等 2005 <sup>17</sup>           | 50  | 12周的开放标签NRT(最高63 mg/天的贴片)加每周小组心理教育治疗;实现戒烟的受试者单盲随机进入NRT组或安慰剂组,每2周心理教育,最长6个月     | 90天开放标签阶段结束时戒烟率为36%;预防复吸戒烟结束时,NRT组67%保持戒烟,安慰剂组为0%( $P<0.01$ )                                                                                                              | 传统及非典型抗精神病的药物类型不影响结果;NRT组中受试者没有因不良反应而退出                                      |
| Williams 等 2010 <sup>33</sup>        | 100 | 26周治疗,包括24节结合动机、认知行为以及心理学教育内容的项目,或9场药物管理项目。两组均接受16周的NRT(21 mg贴片);由心理健康临床医生给予治疗 | 目标戒烟日12周后,高强度治疗组的持续戒烟率为16%,低强度治疗组为26%(NS);6个月和12个月随访时的持续戒烟率分别为17%和14%,不存在组间差异                                                                                              | 治疗或戒烟对精神症状无影响;3个月随访时,无论治疗条件如何,较高出席率均与较高戒烟率相关                                 |

注:缩写:ALA=美国肺科协会;CBT=认知行为疗法;CI=可信区间;CPD=每日吸烟数;NRT=尼古丁替代疗法;NS=不显著。

有显著增高(10.9%比6.6%,与对照组相比;比值比1.72,99%可信区间0.58~5.09),但显著地是,治疗组中更多的人将每天的吸烟数量减少了一半(2.09,99%可信区间1.03~4.27)。当4年后再次联系该研究的受试者时,有18%的人戒烟。12个月随访时的戒烟与4年时的戒烟显著相关,但治疗组没有预测4年的结果<sup>16</sup>。总的来说,这些研究表明,包含NRT的疗法对于精神分裂症吸烟者平均6~12个月的戒烟率约为13%。然而,由于缺乏安慰剂组,难以根据这些研究得出确切的结论。

一项安慰剂对照研究调查了NRT对预防精神分裂症吸烟者复吸的效果<sup>17</sup>。50名门诊患者接受每天14~63 mg的尼古丁贴片90天,以及每周的小

组激励支持。实现戒烟(36%)的受试者随后被随机分配,继续接受尼古丁贴片(相同剂量)或安慰剂贴片,以及每2周1次的小组支持,持续6个月。这一阶段结束时,NRT组受试者保持戒烟的人数显著高于安慰剂组(67%比0%; $P<0.01$ )。该结果表明,长时间的NRT是可行的,并能减少精神分裂症吸烟者的复吸。

#### 安非他酮

安非他酮,一种弱多巴胺和去甲肾上腺素再摄取抑制剂,和 $\alpha3\beta2$ 和 $\alpha4\beta2$ 烟碱型乙酰胆碱受体(nAChRs)拮抗剂,能够减少戒断症状和尼古丁强化<sup>18</sup>。表2展示了安非他酮用于精神分裂症吸烟者的开放标签和安慰剂对照试验的结果。

表2 单用安非他酮或联用NRT治疗精神分裂症门诊患者的戒烟试验结果\*

| 研究                            | 数量 | 干预                                                                       | 戒烟率                                                                                                              | 其他结果                                                                                                       |
|-------------------------------|----|--------------------------------------------------------------------------|------------------------------------------------------------------------------------------------------------------|------------------------------------------------------------------------------------------------------------|
| Weiner等<br>2001 <sup>19</sup> | 9  | 14周开放标签安非他酮(150 mg, BID), 9周的每周小组心理教育治疗;无对照                              | 89%完成治疗,无人戒烟                                                                                                     | 治疗期间平均呼出气CO水平减半;精神分裂症状评分及神经认知测试无变化                                                                         |
| Evins等<br>2001 <sup>20</sup>  | 19 | 12周随机双盲安慰剂对照试验,安非他酮(150 mg/天)以及9周的每周CBT                                  | 所有接受至少一剂药物的参与者完成治疗;6个月时安非他酮组持续戒烟率11%,安慰剂组0%(NS)                                                                  | 6个月时,33%安非他酮组和11%安慰剂组参与者,经生化证实CPD减少50%( $P<0.001$ );治疗期间安非他酮组精神症状减轻,安慰剂组加重;未出现严重不良反应;试验期间每组有2名患者增加抗精神病药物剂量 |
| George等<br>2002 <sup>22</sup> | 32 | 10周随机双盲安慰剂对照治疗,安非他酮(150 mg, BID)以及每周的CBT                                 | 78%完成治疗;治疗结束时安非他酮组戒烟率显著较高(时点戒烟率50%比12.5%, $P<0.05$ ;持续戒烟率37.5%比6.3%, $P<0.05$ ),但6个月时无差异(18.8%比6.3%, $P=0.29$ )  | 服用非典型抗精神病药物的受试者中,试验结束点戒烟率为安非他酮组67%,安慰剂组20%( $P<0.01$ ),服用传统抗精神病药的患者中,两组均为0%;安非他酮与阴性症状的减少有关,对阳性或其他症状无效      |
| Evins等<br>2005 <sup>23</sup>  | 57 | 12周随机双盲安慰剂对照治疗,安非他酮(150 mg, BID)以及每周的CBT                                 | 81%至少接受1周药物的受试者完成治疗;治疗结束时,安非他酮组的时点戒烟率及4周持续戒烟率均高于安慰剂组(2次测量均为16%比0%; $P<0.05$ );干预结束后3个月随访时,安非他酮组和安慰剂组的戒烟率均为4%(NS) | 治疗期间安非他酮组的呼出气CO水平低于安慰剂组,特别是服用非典型抗精神病药的患者;安非他酮组与安慰剂组相比,精神病症状减少的倾向更明显                                        |
| Evins等<br>2007 <sup>24</sup>  | 51 | 12周随机双盲安慰剂对照治疗,安非他酮(150 mg, BID)+NRT(21 mg贴片+口香糖)或安慰剂+NRT;均接受每周的CBT      | 71%至少接受1周药物的患者完成治疗;12、24和52周时的戒烟率组间无显著性差异(36%比19%,20%比8%,12%比8%)                                                 | 6个月随访时,安非他酮+NRT组中有更多患者的CPD减少50%(32%比8%, $P<0.05$ );安非他酮或戒烟对精神病症状无影响                                        |
| George等<br>2008 <sup>25</sup> | 59 | 10周随机双盲安慰剂对照治疗,安非他酮(150 mg, BID)+NRT(21 mg贴片)或安慰剂+NRT;均接受每周的CBT          | 72%接受至少一剂药物的患者完成治疗;治疗结束时安非他酮+NRT组的持续戒烟率较高(27.6%比3.4%,比值比10.67,95%CI 1.24 ~ 91.98),但6个月随访时不显著(13.8%比0%)           | 药物治疗或戒烟对精神分裂或抑郁症状无影响                                                                                       |
| Weiner等<br>2012 <sup>26</sup> | 52 | 12周随机双盲安慰剂对照治疗,安非他酮(150 mg, BID)加心理教育和支持讨论;还提供尼古丁口香糖,但没有参与者选用            | 78%接受至少一剂药物的患者完成治疗;持续戒烟率(安非他酮18%,安慰剂11%)、时点戒烟率和其他指标没有组间差异                                                        | 安非他酮对精神病症状或神经心理测试无影响                                                                                       |
| Cather等<br>2013 <sup>27</sup> | 41 | 12周开放标签治疗,安非他酮+NRT(21 mg贴片以及口香糖或含片)以及CBT;3个月时戒烟的被试接受额外12个月的药物治疗及CBT;无对照组 | 42%的患者3个月时戒烟并进入预防复吸阶段;12个月预防复吸阶段结束时,65%的患者经生化证实实现7天时点戒烟,59%的人报告4周持续戒烟                                            | 精神病症状未加重;24周时1位患者调整了抗精神病药物                                                                                 |

注:\*缩写: BID=每天2次; CBT=认知行为疗法; CI=可信区间; CO=一氧化碳; CPD=每日吸烟数; NRT=尼古丁替代疗法; NS=不显著。

一项早期的观察性开放标签安非他酮研究(2001年; $n=9$ )发现,尽管没有患者实现戒烟,但平均呼出气的一氧化碳(CO)水平减半<sup>19</sup>。一项同期的安慰剂对照试验( $n=19$ )也报告了尽管安非他酮没有显著增加戒烟率,但显著降低了随访时的呼出气CO水平( $P<0.001$ )<sup>20</sup>。此外,2年后的一项随访评估发现,最初减少吸烟的人更有可能实现戒烟( $P<0.005$ )<sup>21</sup>。

2项对32和57名精神分裂症吸烟者的安慰剂对照试验发现,安非他酮显著提高了治疗期间的持续戒烟率( $P<0.05$ ),尽管这一效果在3~6个月随访时未持续<sup>22-23</sup>。类似地,2项试验在精神分裂症吸烟者中比较安非他酮加NRT与安慰剂加NRT,发现安非他酮加NRT显著增加治疗期间持续戒烟的可能性(表2),但在3~12个月随访时无效<sup>24-25</sup>。有些奇怪的是,安非他酮加NRT的效果并没有优于之前单用安非他酮的研究结果<sup>22</sup>。

最后,一项52位患者参与的安非他酮安慰剂对照试验,其中也提供尼古丁口香糖,但没有患者选用,该试验发现治疗最后4周的持续戒烟率没有显著性差异<sup>26</sup>。

总的来说,多数针对精神分裂症吸烟者的安非他酮安慰剂对照试验,无论有无NRT,都显示安非他酮能提高起始戒烟率,但停止治疗后复吸率较高。这表明精神分裂症吸烟者需要长期治疗。

在一项探查长期使用开放标签安非他酮加NRT效果的观察性试验中,41名精神分裂症吸烟

者接受安非他酮加NRT(贴片加口香糖或含片)以及CBT 3个月。这一阶段结束时,实现戒烟的人(42%)进入为期12个月的预防复吸阶段,包括安非他酮加NRT以及CBT<sup>27</sup>。12个月评估时,59%的人实现持续戒烟4周。尽管该研究缺少安慰剂组,但加上之前关于预防复吸的NRT研究结果<sup>17</sup>,其结果支持使用长期药物治疗减少精神分裂症吸烟者复吸的方法。

#### 伐尼克兰

伐尼克兰,一种 $\alpha 4\beta 2$  nAChRs部分激动剂和 $\alpha 7$  nAChRs完全激动剂<sup>28</sup>,替代并阻碍尼古丁的强化作用,并且在一般人群中比安非他酮或单一形式NRT更有效<sup>29</sup>。表3显示了精神分裂症吸烟者中伐尼克兰试验的结果。

一项安慰剂对照试验( $n=9$ )发现4名精神分裂症吸烟者服用伐尼克兰后,3名在治疗期最后4周实现持续戒烟,相比之下安慰剂组为零( $P=0.14$ )。治疗4周后,与安慰剂组相比,伐尼克兰组中呼出气CO水平有显著降低( $P=0.02$ ),并且精神病症状或自杀观念未增加<sup>30</sup>。

一项对128名精神分裂症吸烟者伐尼克兰使用简短咨询的多中心安慰剂对照试验发现,在治疗结束时,伐尼克兰显著提高时点戒烟率(19%比4.7%; $P<0.05$ ),但在6个月随访时无效<sup>31</sup>。各情况不良事件率相似(见表3),两组中精神分裂症症状均稳定或减少。

最后,近来一项10个中心的安慰剂对照试验

表3 伐尼克兰治疗精神分裂症门诊患者的戒烟试验结果\*

| 研究                               | 数量  | 干预                                                                                                     | 戒烟率                                                                                                                                                                                                                  | 其他结果                                                                                                                              |
|----------------------------------|-----|--------------------------------------------------------------------------------------------------------|----------------------------------------------------------------------------------------------------------------------------------------------------------------------------------------------------------------------|-----------------------------------------------------------------------------------------------------------------------------------|
| Weiner 等<br>2011 <sup>30</sup>   | 9   | 12周随机双盲安慰剂对照治疗(1 mg, BID), 基于ALA“不再吸烟”项目的个体咨询                                                          | 89%随机入组的受试者完成治疗; 治疗最后4周期间, 伐尼克兰组75%和安慰剂组0%的受试者实现持续戒烟( $P=0.14$ )                                                                                                                                                     | 通过时间相互作用对呼出气CO水平有显著治疗( $P<0.05$ ); 阳性症状、焦虑或抑郁没有组间差异; 未出现自杀观念; 不良反应与一般人群报告的相似                                                      |
| Williams 等<br>2012 <sup>31</sup> | 128 | 12周随机双盲安慰剂对照治疗(1 mg, BID), 以及每周的咨询                                                                     | 77%接受至少一剂药物的患者完成治疗, 没有组间差异; 治疗结束时伐尼克兰组的时点戒烟率显著更高(19%比4.7%; $P<0.05$ ), 但6个月随访时不显著(11.9%比2.3%; $P=0.09$ )                                                                                                             | 各种情况不良事件率相似; 伐尼克兰组中2名患者出现3次与治疗相关的严重不良事件(1次尝试自杀), 安慰剂组0次; 有1例无关死亡; 积极治疗期间的自杀观念比率无组间差异; 两组中的阳性、阴性以及锥体外系症状均稳定或减少                     |
| Evins 等<br>2014 <sup>32</sup>    | 247 | 12周随机双盲安慰剂对照预防复吸研究; 完成12周开放标签伐尼克兰(1 mg BID)和CBT阶段, 达到戒烟标准的患者, 进入预防复吸阶段, 接受12~52周伐尼克兰(1 mg BID)或安慰剂加CBT | 参与治疗的203名患者中, 87人在开放标签阶段结束时实现2周及以上的持续戒烟, 进入预防复吸阶段; 52周时伐尼克兰组的时点戒烟率较高(60%比19%; 比值比6.2, 95%CI 2.2~19.2); 伐尼克兰组的持续戒烟率在12~52周(45%比15%; 4.6, 1.5~15.7)、12~64周(40%比11%; 5.2, 1.6~20.4)、12~76周(30%比11%; 3.4, 1.02~13.6)期间较高 | 精神病症状、健康、体质指数和尼古丁戒断不存在组间差异; 随机阶段期间有11名患者入院; 伐尼克兰和安慰剂组各有2人因医疗事件, 伐尼克兰组2人、安慰剂组5人因精神事件; 开放标签阶段有4%受试者报告出现自杀观念, 预防复吸阶段为5%~6%, 但未出现尝试自杀 |

注: \*缩写: ALA=美国肺科协会; BID=每天2次; CBT=认知行为疗法; CI=可信区间; CO=一氧化碳。

调查了伐尼克兰是否能减少复吸<sup>32</sup>。共有247名精神分裂症或双相障碍患者入组,203名进入开放标签治疗阶段。这些人中,87名(43%)实现2周的持续戒烟,并进入预防复吸阶段,这一阶段他们被随机分到伐尼克兰组或安慰剂加CBT组。52周时,伐尼克兰组受试者的时点戒烟率明显更高(60%比19%;比值比6.2,95%可信区间2.2~19.2),12~76周的持续戒烟率也更高(30%比11%;3.4,1.02~13.6)。伐尼克兰对精神病症状无影响。每组有2名患者在维持阶段报告有过自杀观念,但没有尝试自杀。因此,在实现戒烟的精神分裂症吸烟者中,伐尼克兰有较好的耐受性,可提高长期戒烟时间达76周<sup>32</sup>。

#### 比较心理社会治疗的研究

所有这些研究都包含心理社会学成分,通常是CBT,但比较不同心理社会治疗效果的研究不多。一项包括45人的研究发现,在治疗结束时,接受定制治疗的精神分裂症吸烟者,其持续戒烟率高于接受美国肺科协会(ALA)“不再吸烟”项目的参与者,但这些效果在6个月随访时相反<sup>13</sup>。

另一项研究比较了精神分裂症吸烟者高强度与低强度的行为治疗,87名被试接受了16周的NRT,发现戒烟率无差异<sup>33</sup>。而另外一项包括78人的研究比较了40分钟动机访谈、40分钟心理教育咨询或仅5分钟建议在寻求戒烟治疗的精神分裂症吸烟者中的效果。该研究发现接受动机访谈的患者比其他方法的患者更有可能寻求和参加戒烟治疗( $P<0.05$ )。这表明单次的动机访谈可增加这些患者寻求戒烟治疗的可能性<sup>34</sup>。

当患者满足某个客观测量的治疗目标,例如戒毒的生化指标,为其提供金钱或其他强化,这种方法称为突变管理。这种方法对于精神分裂症吸烟者戒烟的概念研究的验证结果是乐观的<sup>35-36</sup>。因此,这些研究之后有一项研究,针对180名在行为医疗保健环境中治疗的精神分裂症吸烟者,比较了仅用突变管理、突变管理加NRT,以及自我帮助(控制)的效果<sup>37</sup>。接受突变管理的人与对照组相比,更有可能达到戒烟的CO标准( $P<0.001$ ),但却不太可能达到可替宁标准,表明他们在得到金钱援助后便不会再控制吸烟。一项研究调查了在3个星期内,基于可替宁的应急管理 and 安非他酮在精神分裂症患者中的独立和综合作用,发现突变管理显著降低了可替宁水平( $P<0.01$ )。这表明有必要进行更长时间的试验,检测突变管理是否可独立作为这类

人群戒烟的有效方法,或作为辅助疗法<sup>38</sup>。

#### 精神分裂症吸烟者的戒烟结果总结

还没有直接比较NRT、安非他酮、伐尼克兰对精神分裂症吸烟者效果的试验。然而,一篇系统性综述发现安非他酮可以让精神分裂症吸烟者的戒烟增加3倍(比值比3.03,治疗结束时1.69~5.42;6个月时1.02~7.58)。还发现伐尼克兰可增加戒烟近5倍(4.74,治疗结束时1.34~16.71)<sup>39</sup>。NRT对于精神分裂症吸烟者的效果似乎弱于对一般人群的效果,虽然没有研究直接比较这些人群对NRT的反应。此外,虽然NRT是精神疾病吸烟者戒烟的一线推荐疗法<sup>40</sup>,对这类人群还未开展NRT的安慰剂对照试验,而这样的研究备受期待。

一些其他结果也值得注意。首先,有几项研究注意到治疗参加率与戒烟的关系<sup>12,15,33</sup>。尽管这可能是由于治疗的直接影响,或是参加较多或较少治疗患者的自身特点,但给予参加治疗者一些小经济奖励是提高出勤率的有效方法<sup>20,27</sup>。

其次,有几项研究表明,在这类人群中长期维持戒烟药物治疗是可行的、有效的和安全的<sup>17,27,32</sup>。最后,几项研究报告,许多没能完全戒烟的患者也大幅减少了吸烟量。对于没能完全戒烟的精神分裂症吸烟者而言,吸烟减量是否也是能接受的结果,这个问题是十多年前提出的<sup>41</sup>,并且在今天仍值得研究。尽管仅吸烟减量是否有助改善健康还不清楚,但大幅减量可降低尼古丁依赖的严重程度,增加戒烟动机,从而增加未来戒烟的可能性<sup>42-43</sup>。这一观点得到了另一项研究的证实,该研究发现最初减少吸烟的精神分裂症吸烟者,更有可能在2年的随访评估中戒烟<sup>21</sup>。

#### 精神分裂症-吸烟共病的机制

精神分裂症与吸烟的社会和环境易感因素有关,例如贫穷、低教育水平、失业,以及缺乏对烟草使用的临床关注(图1)<sup>44</sup>。这些因素对于精神分裂症人群吸烟的贡献还未充分研究,因为实验室研究主要聚焦于可能导致这类人群吸烟的神经生物学因素上。

相对于其他吸烟者,精神分裂症吸烟者的尼古丁代谢物含量较高<sup>10</sup>,这是因为他们吮吸香烟更猛烈,特别是吮吸间隔短<sup>45-46</sup>。这些吸烟者较高尼古丁摄入的功能重要性还不清楚,但往往与试图缓解

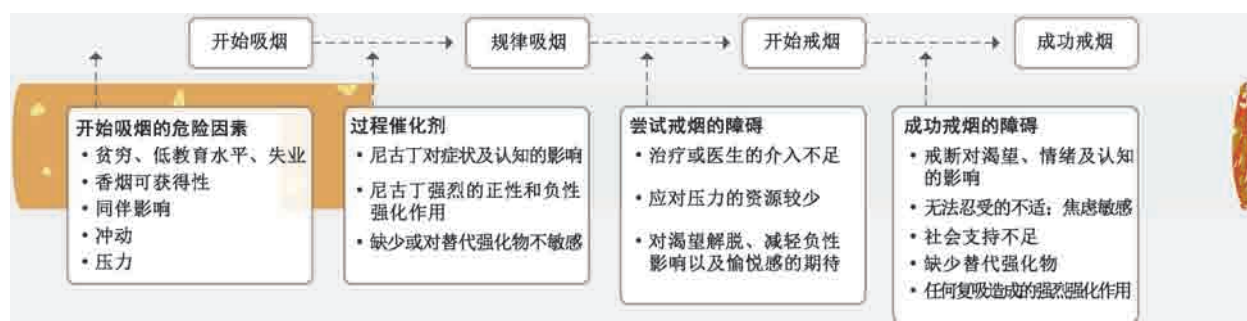

图1 精神分裂症患者吸烟的发生和发展原因以及尝试戒烟和成功戒烟的障碍

精神病症状、认知缺陷以及抗精神病药的镇静作用有关<sup>47-48</sup>。

尼古丁可通过影响 $\alpha 7$  nAChRs改善精神分裂症吸烟者的感觉门控<sup>49-50</sup>,并通过刺激 $\beta 2$  nAChRs以及皮质多巴胺下游效应改善阴性症状和认知表现<sup>51-53</sup>。支持这一观点的证据为,精神分裂症吸烟者与无精神问题的吸烟者相比,在一些认知表现测量中,对于尼古丁戒断和替代的影响更为敏感<sup>54-55</sup>,但这不能够普遍观察得到<sup>56</sup>。吸烟的发生一般先于精神分裂症的发作,这支持了是一般神经生物学易感因素引发这种共病的观点,但较早开始吸烟或许也是精神分裂症前驱期的标志<sup>57-58</sup>。

### 精神分裂症人群吸烟的原因

精神分裂症的神经病理学可能导致精神分裂症吸烟者体验到更强的尼古丁强化作用<sup>59-60</sup>。一项研究的结果支持了这一假说,该研究中的精神分裂症和抑郁症吸烟者,更愿意选择吸烟而不是其他行为(如吃糖或看电影)作为强化剂,对吸烟的喜好程度打分超过无精神障碍对照组1倍<sup>61</sup>。然而,对这些结果的另一种解释认为,精神分裂症和抑郁症吸烟者从非吸烟活动中得到的乐趣较少(快感缺失)。

为了深入了解精神分裂症患者高吸烟率背后的机制,许多研究询问了这些人他们为什么吸烟。最近一项大型综合数据集的吸烟动机分析显示,患有精神障碍的吸烟者将应对动机(吸烟以减少渴望及负性情绪)列为吸烟的主要原因,快乐动机是次要原因。较少有人选择疾病动机(吸烟以减少精神病症状或抗精神病药物的不良反应)<sup>62</sup>。抑郁症吸烟者对这些动机的排列顺序与精神分裂症吸烟者相同,但赞同率明显偏低( $P < 0.001 \sim 0.05$ )<sup>62</sup>。使用生态瞬时评估技术比较这些疾病患者吸烟原因的研究,有助于明确这些群体中与吸烟有关的共同及独特因素。

### 复吸的原因

戒烟期间,尼古丁戒断对负性情绪、吸烟欲望以及认知功能的影响可能造成精神分裂症吸烟者的早期复吸(图1)。一项研究为戒烟超过3天提供高额奖金激励,试图比较精神分裂症吸烟者与无精神障碍对照组的戒烟效果,发现精神分裂症患者在戒烟期间报告了更高水平的负性情绪,以及缓解负性情绪的渴望<sup>63</sup>。除了无力感有小幅增加,精神病症状不受影响,这与先前一项研究一致<sup>64</sup>。

戒烟对精神分裂症吸烟者认知功能的负性情绪,如前所述,也可能导致早期复吸,因为戒烟需要相当长的任务持久性,以及精神分裂症吸烟者甚至在尝试戒烟前就已受损的其他执行功能<sup>65-66</sup>。此外,精神分裂症患者戒烟后重新吸烟,会比对照组体验到更强的尼古丁强化作用以及积极情绪的极大提升<sup>63</sup>。这些研究显示,高水平的负性情绪和渴求,伴随着吸烟会改善这些状态的期待;戒烟期间加重的执行功能障碍;以及戒烟一段时间后复吸的强大强化作用,可能造成这类人群复吸率较高。

然而,探索慢性精神疾病人群吸烟机制的研究所得出的结论较为有限。有关社会环境因素在多大程度上造成病例、对照组之间这些生物学机制的差异,多数实验室研究没有检测。

### 单相和双相抑郁

与一般人群相比,情感障碍,例如单相和双相抑郁症,一般与戒烟率的降低有关<sup>15</sup>,尽管这一差异在接受正式戒烟治疗的人中不明显<sup>67</sup>。与首发抑郁症吸烟者相比,复吸性抑郁症吸烟者的尼古丁依赖水平较高,戒烟尝试也较少<sup>68</sup>,并且难以忍受痛苦的人特别容易很快复吸<sup>69</sup>。

### 单相抑郁

最近一篇描述性综述选择1990到2010年间

发表的68个研究,调查了戒烟治疗对单相抑郁症吸烟者的效果<sup>70</sup>。尽管多数研究发现戒烟效果在有无抑郁症人群中无差异,在探查到差异的研究中,抑郁症与较差结果相关,特别是在女性中<sup>70</sup>。

至于具体治疗方法的相对有效性,2010年发表的一篇荟萃分析,选取对单相抑郁症吸烟者的治疗试验,发现NRT比安慰剂更有效,并且将行为情绪管理加到戒烟咨询中可改善治疗结果<sup>71</sup>。另外,安非他酮和去甲替林可有效治疗单相抑郁症人群的吸烟<sup>72-73</sup>。值得注意的是,多数研究都聚焦于终身抑郁症;很少有研究调查当前抑郁对戒烟的影响<sup>70-71</sup>。尽管这一人群中的复吸率较高,但安非他酮长程治疗可减少已实现戒烟人群的复吸率<sup>74</sup>。

近期一项多中心安慰剂对照试验检测了12周伐尼克兰治疗对525名稳定现患或曾患抑郁症人群戒烟的效果<sup>75</sup>。研究失访率较高(接近三分之一),但组间无差异。伐尼克兰显著增加治疗最后4周(35.9%比15.6%;比值比3.35, 2.16~5.21)及52周时(2.36, 1.40~3.98)的持续戒烟率,且不会加重抑郁或焦虑<sup>75</sup>。因此,尽管早期关于伐尼克兰与自杀倾向、抑郁相关的担忧<sup>76</sup>招致美国食品药品监督管理局(FDA)的黑框警告,本研究的证据表明伐尼克兰是稳定现患或曾患抑郁症人群戒烟的有效疗法,具有较好的耐受性。

### 双相抑郁

探讨双相抑郁症吸烟者戒烟治疗的研究较少。2项仅各有5名患者的安非他酮和伐尼克兰安慰剂对照试验、1项9名患者的伐尼克兰开放标签试验,显示出较好结果,且精神病症状无加重<sup>77-79</sup>。之后一项伐尼克兰的安慰剂对照试验纳入60名稳定的双相抑郁患者,结果发现伐尼克兰显著增加治疗结束时的戒烟率(48%比10%; 8.13, 2.03~32.53),尽管差异在6个月时不再显著(19%比7%; 3.2, 0.60~17.6)<sup>80</sup>。伐尼克兰与异常做梦频率增高( $P=0.04$ ),负性情绪事件增多的非显著趋势有关( $P=0.08$ ),但除此之外,对于治疗引发的紧急或严重不良事件,各组间无差异。试验期间,8名伐尼克兰组被试、5名安慰剂组被试出现自杀观念(不显著)<sup>80</sup>。用伐尼克兰维持治疗被认为可减少双相抑郁症吸烟者戒烟后的复吸<sup>32</sup>。

### 抑郁症-吸烟共病的机制

单相或双相抑郁症与吸烟之间的联系可能是因为增加这两种疾病风险的生物、社会环境因素,吸烟以减少精神病症状,尼古丁的效果或这些疾病发展时的香烟暴露,或双向因果关系<sup>81-85</sup>。与精神分裂症吸烟者一样,单相抑郁症吸烟者表示他们吸烟主要是为了应对渴望和负性情绪,其次才是为了愉悦<sup>62</sup>。然而他们与没有抑郁症的吸烟者一样担心吸烟对健康的影响,并同样想戒烟<sup>86-87</sup>。

#### 戒断反应

当他们尝试戒烟,单相抑郁症吸烟者,特别是女性,与无抑郁症吸烟者相比,会报告更严重的戒断反应,且更容易将复吸的原因归为戒断反应<sup>88-90</sup>。

吸烟及戒烟对情绪的影响是通过尼古丁对单胺和神经内分泌系统的影响而调节的<sup>91</sup>。长期的尼古丁摄入使nAChRs麻痹或失活,而这会通过多巴胺和其他单胺的活动产生抗抑郁效果<sup>91-92</sup>。此外,戒烟会增加单胺氧化酶A(MAO-A)水平,这种酶会代谢多巴胺和其他单胺,而这与情绪低落的发生有关<sup>93</sup>。

一旦戒断症状逐渐消失,戒烟似乎与多数吸烟者的抑郁加重无关,虽然存在相当大的异质性,且出现症状加重的人戒烟结果也较差<sup>94</sup>。近期流行病学研究和系统性综述得出的结论是,稳定的抑郁症人群中,成功戒烟或许与情绪改善有关<sup>95-96</sup>。然而,这一关系中的因果方向还未确定,戒烟可能改善情绪,或是尝试戒烟时没有出现情绪恶化可能更容易保持戒烟。

#### 吸烟的强化作用

除了戒烟初期会出现更强烈的戒断症状,抑郁症吸烟者还可能体验更强烈的吸烟强化作用。试验研究表明,有抑郁症病史的吸烟者与无抑郁症吸烟者相比,在各种替代强化物中,如看电影或吃糖,更可能选择吸烟<sup>61</sup>。在实验室环境中,他们也可能抽更多的香烟,无论心情如何<sup>97</sup>,且与对照组相比,他们吸烟后不久再次吸烟的欲望(对吸烟正强化作用的渴望)水平更高<sup>98</sup>。

抑郁与突触内多巴胺的低静息水平有关<sup>99-100</sup>,而抑郁症吸烟者与无抑郁症病史吸烟者相比,吸1根烟后,会出现纹状体多巴胺的大幅度增加,这或许是这些强化作用增强的原因<sup>101</sup>。快感缺失是指回应愉快刺激的正性情感缺失,无论诊断与否,都与尼古丁对正性情绪、戒烟期间渴求香烟、快速复

吸影响的敏感度提高有关<sup>102-104</sup>。

此外,快感缺失的人在尝试戒烟期间更难找到替代吸烟的强化活动<sup>105</sup>。总的来说,这些研究表明高水平的戒断反应相关负性情绪、不适的低耐受性、易受吸烟强化作用引诱,以及对替代强化刺激的不敏感,会导致抑郁症人群戒烟失败(图1)。因此,除了药物治疗和情绪管理,抑郁症吸烟者从治疗中的获益还包括可能发现并投入其他的强化活动中去。

#### 导致持续吸烟的其他因素

与针对精神分裂症或单相抑郁的研究相比,探讨双相障碍人群吸烟机制的人类实验室研究少之又少。在双相障碍人群中,吸烟与更加严重的情绪症状、共患精神病和成瘾性疾病以及自杀倾向有关<sup>106-111</sup>。另外,一项对685名双相障碍患者的网上调查显示,近半数患者报告他们通过吸烟来管理精神病症状<sup>112</sup>。该研究还发现,虽然74%接受调查的患者希望戒烟,但仅有33%收到过戒烟的医疗建议,提示缺少临床关注很可能是造成这类人群长期吸烟的原因<sup>112</sup>。与对精神分裂症吸烟者的一些研究不同,单相和双相抑郁症吸烟者在吸烟状况对神经精神表现的影响这方面,与对照组无差异。这提示尼古丁的促进认知作用或许不是这类人群吸烟的原因<sup>113</sup>。

### 焦虑症

无精神病人群的吸烟率从2004到2011年显著下降,但在患有焦虑症的人群中没有下降<sup>6</sup>。因此,目前在吸烟者中,焦虑症的发病率显著增加,女性更明显<sup>114</sup>。

一项纳入1504名吸烟者的大型试验比较了单药和组合药物治疗吸烟的效果,有研究对该试验数据进行了二次分析,关注精神疾病是否会弱化治疗反应<sup>115</sup>。控制治疗、年龄、性别和种族后,终身焦虑症吸烟者的戒烟率显著低于无精神病史吸烟者,目标戒烟日8周后的数字为(39.9%比47.4%;比值比0.72, 0.55~0.94),6个月后为(28.7比35.4%; 0.72, 0.54~0.95)。在控制终身情感或物质滥用障碍后,在这两个随访时间点,终身焦虑史仍是预后较差的预测因子。

一项更具体的分析探查了吸烟的结果和具体焦虑诊断患者(惊恐发作、社交焦虑、广泛性焦虑)

的危险因素,指出患有社交焦虑或广泛性焦虑的人,基线尼古丁依赖更为严重。此外,与无焦虑症吸烟者相比,有3种诊断中的任何一种的患者在戒烟前的负性情绪和戒断症状更高<sup>116</sup>。

焦虑症吸烟者还报告了在戒烟日前后戒烟疲劳(厌倦尝试戒烟)的较大增多,提示这些患者可能没有足够的应对资源。有趣的是,虽然在无焦虑症吸烟者中,组合药物治疗与安慰剂相比,可使戒烟可能性提高1倍,但在有终身焦虑史的吸烟者中,单药或组合药物治疗的效果均不优于安慰剂<sup>116</sup>。类似地,在单相抑郁症吸烟者中,共患焦虑症与对安非他酮、NRT联用的较差反应有关<sup>117</sup>。

#### 焦虑-吸烟共病的机制

研究表明,焦虑症患者可能会吸烟以减轻焦虑,早期吸烟或烟草暴露可能增加发生焦虑症的可能性,共有的脆弱性可能增加两者的风险<sup>118-119</sup>。

已有的支持焦虑障碍和吸烟之间关联的生物学机制,包括对几种神经递质系统的影响、氧化和亚硝化应激以及表观遗传效应<sup>120</sup>。特别是鉴于乙酰胆碱传递的减少可改善影响,该系统的失调可能是焦虑症的原因之一<sup>92</sup>。

#### 负性强化模型

多数关于吸烟和焦虑的研究侧重于负性强化模型,例如吸烟以应对负性情绪或在社交场合感到舒适<sup>121-124</sup>。例如,作为探讨青少年焦虑与物质使用间关系的范例,一项对同伴物质使用的纵向研究发现,社交焦虑较高的女孩,当她们认为同伴对吸烟的认可度高时,更有可能去吸烟,而认为较低时则不太可能<sup>125</sup>。然而,具有广泛性焦虑症状的女孩对同伴吸烟的看法给出了相反的回音,突出了焦虑诊断的变化性<sup>125</sup>。具有高焦虑敏感性或恐惧焦虑,以及相关感觉的人,也有强烈的吸烟动机来减少负性情绪和焦虑相关痛苦<sup>121-122,124</sup>。

尽管焦虑症吸烟者戒断症状的增加是否影响复吸的资料存在矛盾<sup>88,127</sup>,当焦虑症吸烟者试图戒烟时,他们会报告比无焦虑症吸烟者更严重的戒断症状<sup>88,90,126</sup>。

#### 复吸的原因

实验室和治疗研究还发现,焦虑症吸烟者在戒烟期间具有比无焦虑症吸烟者更高水平的吸烟欲望和尼古丁戒断症状<sup>116,126,128</sup>。然而,这些差异也存在于戒烟前,这或许反映了戒断样症状的过分紧张



水平<sup>116</sup>。总的来说,这些研究提示,戒烟期间的高水平负性情绪,加上认为这些症状与伤害有关(焦虑敏感<sup>129-130</sup>),以及预期吸烟会减少负性情绪,很可能是尝试戒烟期间快速复吸的原因(图1)。

## PTSD

只有4项随机临床试验研究了戒烟干预中对PTSD吸烟者的效果。其中2项研究的重点是将戒烟治疗整合入正在进行的精神卫生保健,这一方法利用了先前存在的治疗关系和已有的访谈安排。在第一个试验中,66名患有PTSD的退伍军人被随机分配到以临床实践指南为蓝本的综合护理组或标准护理组。随机分组9个月后,综合护理组的戒烟率高出5倍<sup>131</sup>。一项更大规模、有943名PTSD吸烟者参与的多中心试验发现,综合护理组在6个月时的戒烟率明显更高(16.5%比标准护理组7.2%; $P < 0.001$ ),但在12个月时,超过90%的人不再戒烟<sup>132</sup>。

综合护理干预为感兴趣的人提供戒烟药物治疗,但没有将患者随机分配到药物组与安慰剂组。PTSD吸烟者戒烟药物治疗的唯一一项随机安慰剂对照试验是一个试点研究,15名退伍军人接受了12周安非他酮治疗<sup>133</sup>。安非他酮的耐受性良好,且在6个月随访时戒烟率为40%,而安慰剂组为20%(未报告显著性水平)。

最近,22名PTSD吸烟者被随机分配到4周的突变管理干预或接受不依赖戒烟强化的对照组<sup>134</sup>。所有参与者还接受了2次戒烟咨询,以及NRT和安非他酮。3个月时,戒烟率无显著差异(突变管理组55%,对照组18%)<sup>134</sup>。然而,差异的大小表明,缺乏显著性可能是由于样本量较小,应进行充分的试验,以探究突变管理是否是对PTSD吸烟者有效的戒烟疗法。

### PTSD-吸烟共病的机制

与非PTSD吸烟者相比,PTSD吸烟者具有更高水平的抑郁、焦虑和PTSD症状<sup>135-136</sup>。PTSD诊断及症状严重性都与为减少负性情绪的强烈吸烟欲望有关<sup>122,136-138</sup>。使用上述多中心研究的基线资料<sup>132</sup>发现,吸烟会减少负性情绪这一期望可调节PTSD严重性与尼古丁依赖之间的关系,以及PTSD与陷于情感痛苦中戒烟自我效能的负相关<sup>139</sup>。在自然环境中使用生态瞬时评估的研究表明,PTSD

吸烟者靠吸烟来应对负性情绪及创伤提示物<sup>140-141</sup>。总的来说,这些研究强烈地表明PTSD吸烟者通过吸烟应对负性情绪和焦虑。与PTSD相关的认知和注意缺陷也可能引起这类人群的吸烟<sup>142-143</sup>。因尼古丁会提高认知和注意力,戒烟可能会加重认知缺陷<sup>144</sup>,尽管一项研究发现与其他吸烟者相比,PTSD吸烟者没有受到更强的戒烟对前脉冲抑制的有害作用<sup>145</sup>。最后,与无PTSD吸烟者相比,PTSD吸烟者在戒烟期间报告更高的渴望和戒断反应<sup>146</sup>。

## 新兴疗法

戒烟显然是降低烟草相关疾病风险的最有效途径。然而,如果吸烟减量或转用不可燃的尼古丁来源可以减少接触烟草有毒物质或导致最终戒烟,这可能是无法戒烟者可接受的接近结果<sup>41-42</sup>。

### 电子烟

虽然目前对于电子烟安全性和有效性的有力证据很少,电子烟可能比传统香烟对心血管和呼吸的影响较少,并可能有助于人们戒烟<sup>147-148</sup>。一项小规模非对照研究发现,为精神分裂症吸烟者提供电子烟52周,50%的人吸烟减少了一半,14%戒烟,精神病症状没有增加<sup>149</sup>。这些初步结果值得注意,因为没有参与者是一开始想治疗吸烟的,并且这些结果表明有必要在这类人群中开展电子烟对吸烟影响的随机对照试验。

### 监管方法

减少烟草依赖,一个可能的监管方法是减少香烟的尼古丁含量以减少其成瘾性<sup>150</sup>。2009年“家庭吸烟预防和烟草控制法”赋予美国FDA管理烟草制品的权力,包括香烟中尼古丁的允许水平。同样,根据“烟草控制框架公约”第9条,缔约方大会负责制定测量和调控烟草制品含量和排放的指南<sup>151</sup>。

将香烟的尼古丁含量降低到不成瘾水平可以降低烟草依赖的严重性,可能使吸烟者更容易戒烟<sup>152-153</sup>。这种方法对于无法获得足够戒烟治疗或戒烟治疗成功的人来说特别有益。然而,对这种监管方法存在一种担忧,即慢性精神疾病吸烟者可能因尼古丁戒断而出现功能障碍,或尝试通过增加吸烟强度来补偿尼古丁的减少。

最初的研究发现,急性使用非常低尼古丁含量的香烟可以减少精神分裂症吸烟者的戒断症状、吸烟欲望、吸常见品牌香烟,而不会影响精神病症状<sup>154</sup>。正在进行的试验旨在研究这些香烟对吸烟率、有毒物质暴露、精神病症状,以及精神分裂症和情感障碍吸烟者认知功能的影响。

### 未来研究的问题

- 在尝试戒烟期间,精神分裂症、抑郁症和焦虑症人群吸烟的前因和后果是什么?
- 吸烟率的降低是否会减少慢性精神疾病人群中烟草相关危害的生物标志物?
- 吸烟率的降低是否会增加慢性精神疾病人群未来尝试戒烟或成功戒烟的可能性?

### 结论

在临床实践中必须优先考虑对烟草成瘾的治疗,以减少慢性精神疾病人群中烟草相关疾病的高发率和过早死亡。本文综述的研究表明,慢性精神疾病吸烟者可以采用标准戒烟方法戒烟,对精神病症状的影响最小。特别是最近的随机对照试验表明,安非他酮和伐尼克兰在精神分裂症患者中有效<sup>31-32,39</sup>,且伐尼克兰对单相和双相抑郁症人群有效<sup>75,80</sup>。

对焦虑症和PTSD人群的治疗还没有很好的研究,且这些药物对这些疾病吸烟者的效果尚未有足够有力的随机对照试验。小规模研究表明,如果可以解决与延长这些干预措施持续时间有关的可行性挑战,突变管理方法或许对精神分裂症和PTSD吸烟者有效<sup>38,134</sup>。

本文回顾的多数研究纳入的都是大学附属医院为健康计划中治疗的稳定患者。在不太稳定的患者和较少接触患者的环境下,是否有类似的效果还有待确定。因此,治疗慢性精神疾病患者吸烟的下一步重点将是推进在社区行为卫生保健环境中采用、实施和评估实验支持的吸烟疗法。

研究精神疾病和烟草之间共病的研究人员经

常专注于某一特定的精神疾病,然而临床医生要治疗各种疾病和多发并发症的人群。因此,本篇综述的目的是强调不同疾病患者,开始和持续吸烟背后共同的生物心理社会机制。对这些共同因素的了解可能有助于发现适合这些患者的新型预防和烟草治疗方法。最后,鉴于许多患者在治疗期间降低了吸烟率,以及使用新型烟草和尼古丁产品也可能降低吸烟率,重要的是确定吸烟减量是否会增加慢性精神疾病人群最终戒烟的可能性。

### 治疗指南

Treatobacco.net (<http://treatobacco.net/en/index.php>)是一个基于证据信息的独立资源,支持全世界对烟草依赖的治疗。该网站的资源图书馆包含来自30多个国家治疗指南的链接,包括美国公共卫生服务署赞助的临床实践指南<sup>40</sup>,和澳洲皇家全科医师学院2011年指南的2014年更新版<sup>155</sup>。这2个指南都包含治疗精神疾病人群和其他弱势群体吸烟的章节,澳大利亚的指南还包含安非他酮、伐尼克兰在这些人群中的疗效和安全性的最新信息。网站上提供的其他有用资源包括幻灯片、疗效和安全信息的概要以及相关研究的链接。

贡献者(Contributors): Both authors helped in all aspects of the review, approved the version to be published, and agreed to be accountable for all aspects of the work.

资助(Funding): The preparation of this paper was supported by grants U54DA031659 and P50DA036114 from the National Institute on Drug Abuse and the FDA Center for Tobacco Products, and grant P20GM103644 from the National Institute of General Medical Sciences. The content is solely the responsibility of the authors and does not necessarily represent the official views of the National Institutes of Health or the FDA.

利益竞争(Competing interests): We have read and understood BMJ policy on declaration of interests and declare the following interests: JWT has received a consulting fee from Giner (2013). MEM has no competing interests.

患者参与(Patient involvement): No patients were involved in the preparation of this article.

参考文献见 [bmj.com](http://bmj.com) 和 [bmj.yiigle.com](http://bmj.yiigle.com)。

BMJ takes no responsibility for the accuracy of the translation from the published English language original and is not liable for any errors that may occur.

# BMJ
